# Supplementary material for: Effects of Metformin on Metabolite Profiles and LDL Cholesterol in Patients With Type 2 Diabetes
Source: Oxford University Press journal article supplement (doi:10.2337/dc15-0658), 2015-06-08
Supplement: dc150658supplementarydata.pdf [file dc150658supplementarydata.pdf]

## Effects of metformin on metabolite profiles and LDL cholesterol in type 2 diabetes patients

### Supplementary Figure 1. Influence of non-antihyperglycemic agents on type 2 diabetes risk factors

Statin usage was associated with lower levels of low density lipoprotein cholesterol (LDL-C) in all five groups: NGT, IGT, ndt-T2D, mt-T2D and it-T2D (plot A); treatment with beta blockers (plot B), angiotensin-converting-enzyme (ACE) inhibitors (plot C), or angiotensin receptor blockers (ARB) (plot D) are associated with different levels of systolic blood pressure (BP). NGT, normal glucose tolerance; IGT, impaired glucose tolerance; ndt-T2D, non-drug treated type 2 diabetes; mt-T2D, metformin-treated type 2 diabetes, it-T2D, insulin-treated type 2 diabetes.

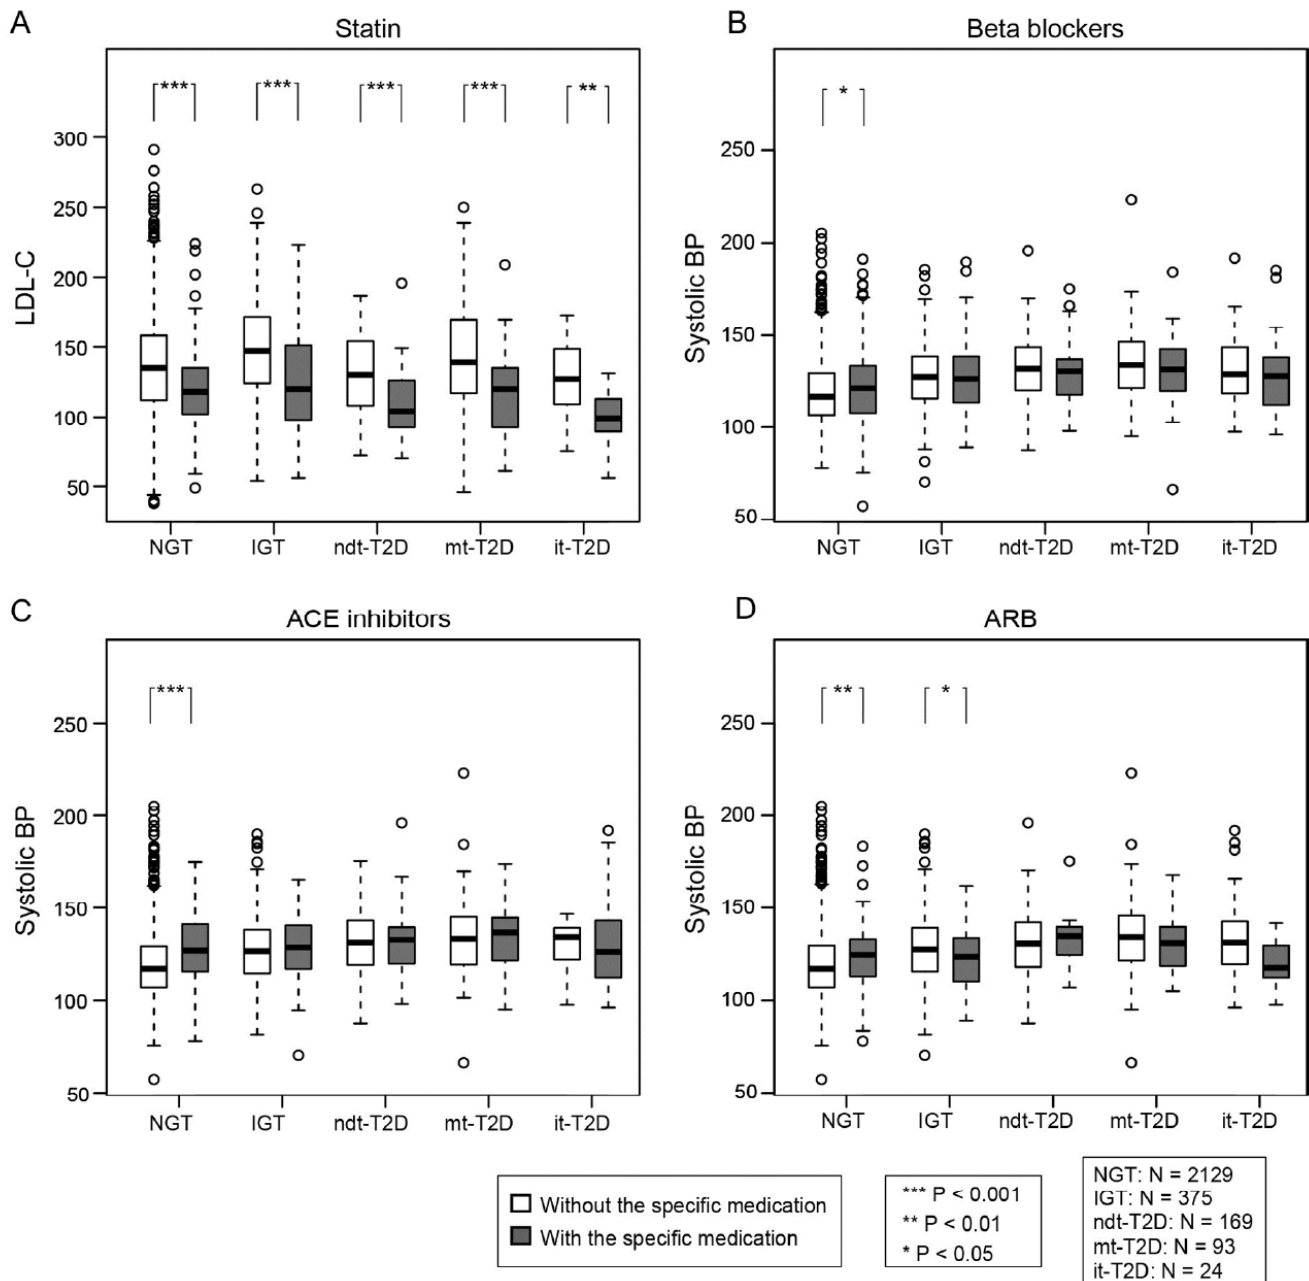

SUPPLEMENTARY DATA

**Supplementary Figure 2. Correlation of the three metformin-associated metabolites with risk factors of type 2 diabetes**

The spearman correlation coefficients between the three metformin-associated metabolites and conventional risk factors of type 2 diabetes including LDL-C, fasting insulin, fasting glucose, and HbA1c, in the cross-sectional KORA F4 study are shown. Both the size of the circle and intensity of color indicate the degree of correlation between the metabolites and the risk factors. The numeric values of spearman correlation coefficients are shown in the upper triangle.

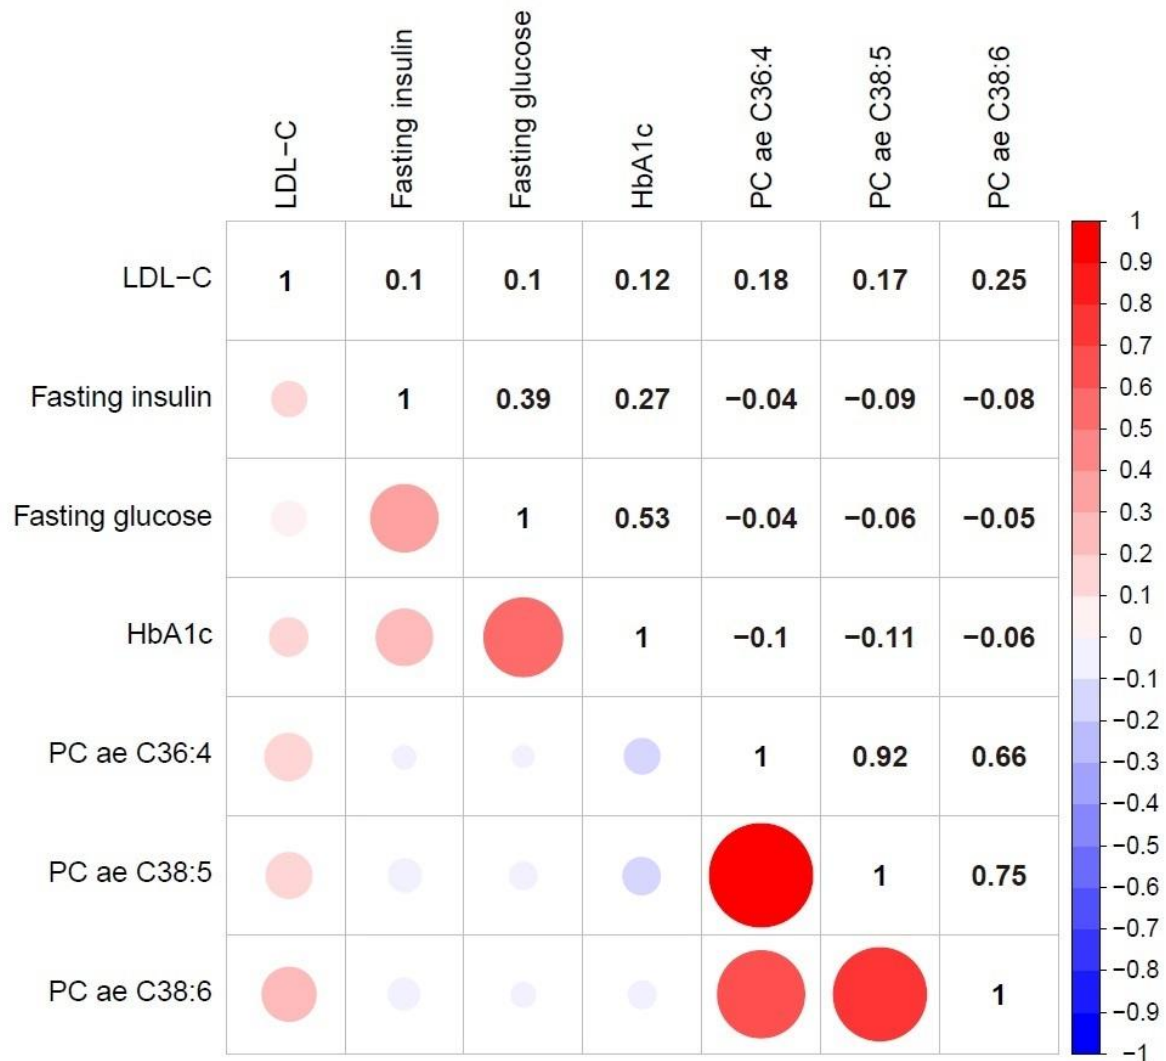

SUPPLEMENTARY DATA

**Supplementary Table 1. Characteristics of the KORA S4 → F4 prospective study samples**

Percentages of individuals or means (SD) are shown for each variable and each group. Abbreviations: w/o, without; w/, with; ndt-T2D, non-anti-diabetic drug treated type 2 diabetes; mt-T2D, metformin-treated type 2 diabetes; BMI, body mass index; h, hour; BP, blood pressure; HDL-C, high-density lipoprotein cholesterol; LDL, low-density lipoprotein cholesterol; ACE, angiotensin-converting enzyme; ARB, angiotensin receptor blockers. Significant *P* values are indicated bold (*P* value<0.05).

|                                  | Baseline S4: w/o metformin<br>Follow-up F4: w/o metformin<br>(n=869) |              |                 | Baseline S4: w/o metformin<br>Follow-up F4: w/ metformin<br>(n=43) |               |                 |
|----------------------------------|----------------------------------------------------------------------|--------------|-----------------|--------------------------------------------------------------------|---------------|-----------------|
|                                  | S4                                                                   | F4           | <i>P</i> -value | S4                                                                 | F4            | <i>P</i> -value |
| Age                              | 63.1 (5.4)                                                           | 70.2 (5.4)   | -               | 63.9 (4.4)                                                         | 71.1 (4.6)    | -               |
| Male                             | 51                                                                   | 51           | -               | 55                                                                 | 55            | -               |
| Weight, kg                       | 77.0 (12.5)                                                          | 77.6 (13.3)  | <b>8.9E-05</b>  | 89.6 (14.2)                                                        | 87.1 (14.8)   | <b>3.4E-04</b>  |
| BMI, kg/m <sup>2</sup>           | 28.0 (4.0)                                                           | 28.3 (4.2)   | <b>6.4E-09</b>  | 32.6 (4.2)                                                         | 31.6 (4.4)    | <b>2.8E-03</b>  |
| Physical activity, > 1h per week | 52.8                                                                 | 47.5         | <b>2.2E-03</b>  | 67.4                                                               | 58.2          | 0.29            |
| High alcohol intake <sup>†</sup> | 20.0                                                                 | 17.2         | <b>0.05</b>     | 27.9                                                               | 20.9          | 0.37            |
| Smoker                           | 11.9                                                                 | 7.4          | <b>1.8E-08</b>  | 18.6                                                               | 11.6          | 0.37            |
| Systolic BP, mmHg                | 133.5 (18.9)                                                         | 127.9 (19.4) | <b>1.5E-13</b>  | 144.0 (17.7)                                                       | 130.8 (17.6)  | <b>4.7E-05</b>  |
| HDL-C, mg/dL                     | 59.3 (16.5)                                                          | 56.7 (14.1)  | <b>2.6E-12</b>  | 53.2 (11.6)                                                        | 52.7 (8.9)    | 0.66            |
| LDL-C, mg/dL                     | 155.5 (39.5)                                                         | 141.8 (36.4) | <b>1.0E-21</b>  | 143.1 (37.2)                                                       | 125.5 (24.4)  | <b>5.6E-03</b>  |
| Total cholesterol, mg/dL         | 245.4 (41.2)                                                         | 223.7 (40.8) | <b>1.5E-26</b>  | 233.9 (41.7)                                                       | 203.37(33.91) | <b>3.5E-04</b>  |
| Triglycerides, mg/dL             | 127.4 (71.1)                                                         | 127.1 (71.4) | 0.76            | 171.8 (165.3)                                                      | 151.2 (148.3) | 0.08            |
| HbA <sub>1C</sub> , %            | 5.6 (0.4)                                                            | 5.7 (0.5)    | <b>0.01</b>     | 6.4 (0.9)                                                          | 6.6 (0.7)     | 0.35            |
| HbA <sub>1C</sub> , mmol/mol     | 38 (4.4)                                                             | 39 (5.5)     | <b>0.01</b>     | 46 (9.8)                                                           | 49 (7.7)      | 0.35            |
| Fasting glucose, mg/dL           | 99.8 (11.1)                                                          | 99.8 (17.4)  | 0.58            | 134.7 (33.1)                                                       | 130.9 (27.3)  | 0.35            |
| Statin usage                     | 9.4                                                                  | 22.7         | <b>1.5E-21</b>  | 9.3                                                                | 30.2          | <b>2.7E-02</b>  |
| Beta blocker usage               | 18.1                                                                 | 31.5         | <b>1.2E-18</b>  | 20.9                                                               | 37.2          | <b>4.6E-02</b>  |
| ACE inhibitor usage              | 9.4                                                                  | 24.4         | <b>9.3E-23</b>  | 20.9                                                               | 51.2          | <b>3.6E-03</b>  |
| ARB usage                        | 3.7                                                                  | 12.4         | <b>1.6E-15</b>  | 2.3                                                                | 13.9          | 0.07            |

<sup>†</sup> ≥40g/day in men; ≥20g/day in women

SUPPLEMENTARY DATA

**Supplementary Table 2. Characteristics of the ERF study samples**

Percentages of individuals or means (SD) are shown for each variable and each group. NGT, normal glucose tolerance; ndt-T2D, non-anti-diabetic drug treated type 2 diabetes; mt-T2D, metformin-treated type 2 diabetes; it-T2D, insulin-treated type 2 diabetes; BMI, body mass index; h, hour; BP, blood pressure; HDL-C, high-density lipoprotein cholesterol; LDL-C, low-density lipoprotein cholesterol; ACE, angiotensin-converting-enzyme; ARB, angiotensin receptor blockers.

| Clinical parameters              | NGT          | ndt-T2D       | mt-T2D       | it-T2D         |
|----------------------------------|--------------|---------------|--------------|----------------|
| <i>n</i>                         | 2396         | 29            | 32           | 3              |
| Age, years                       | 47.9 (14.2)  | 55.7 (11.4)   | 60.7 (11.8)  | 54.4 (15.5)    |
| Males                            | 43.8         | 51.0          | 58.8         | 20.0           |
| BMI, kg/m <sup>2</sup>           | 26.7 (4.5)   | 28.6 (4.5)    | 32.4 (6.1)   | 28.1 (5.8)     |
| Physical activity, > 1h per week | 43.3         | 77.0          | 70.6         | 66.6           |
| High alcohol intake†             | 7.2          | 10.3          | 8.7          | 33.3           |
| Active Smokers                   | 39.3         | 40            | 42.9         | 100            |
| Systolic BP, mmHg                | 138.9 (19.7) | 154.4 (22.1)  | 151.5 (19.2) | 152.50 (35.91) |
| HDL-C, mg/dL                     | 49.4 (13.9)  | 47.1 (13.9)   | 39.4 (9.3)   | 40.15 (10.42)  |
| LDL-C, mg/dL                     | 144.8 (28.2) | 145.2 (42.1)  | 108.5 (30.9) | 122.39 (38.99) |
| Triglycerides, mg/dL             | 115.0 (64.6) | 161.1 (107.1) | 163.7 (92.0) | 151.32 (77.87) |
| HbA <sub>1C</sub> , %            | NA           | NA            | NA           | NA             |
| HbA <sub>1C</sub> , mmol/mol     | NA           | NA            | NA           | NA             |
| Fasting glucose, mg/dL           | 79.8 (11.4)  | 145.0 (21.8)  | 139.3 (49.0) | 170.09 (78.91) |
| 2-h post-glucose load, mg/dL     | NA           | NA            | NA           | NA             |
| Statin usage                     | 17.5         | 34.4          | 58.8         | 100            |
| Beta blocker usage               | 15.7         | 18.8          | 29.9         | 66.6           |
| ACE inhibitor usage              | 5.6          | 9.4           | 19.6         | 66.6           |
| ARB usage                        | 7.8          | 5.9           | 17.6         | 33.3           |
| Metformin usage                  | 0            | 0             | 100          | 0              |
| Insulin therapy                  | 0            | 0             | 0            | 100            |

†  $\geq 20$ g/day for women;  $\geq 40$ g/day for men

SUPPLEMENTARY DATA

**Supplementary Table 3. Characteristics of the NTR study samples**

Percentages of individuals or means (SD) are shown for each variable and each group. Non-T2D, non-type 2 diabetes; ndt-T2D, non-anti-diabetic drug treated type 2 diabetes; mt-T2D, metformin-treated type 2 diabetes; it-T2D, insulin-treated type 2 diabetes; BMI, body mass index; h, hour; BP, blood pressure; HDL-C, high-density lipoprotein cholesterol; LDL-C, low-density lipoprotein cholesterol; ACE, angiotensin-converting-enzyme; ARB, angiotensin receptor blockers.

| <b>Clinical Parameters</b>       | <b>non-T2D</b> | <b>ndt-T2D</b> | <b>mt-T2D</b> | <b>it-T2D</b> |
|----------------------------------|----------------|----------------|---------------|---------------|
| <i>n</i>                         | 1256           | 73             | 29            | 9             |
| Age, years                       | 50.8 (14.1)    | 56.6 (11.0)    | 62.6 (6.5)    | 49.3 (18.9)   |
| Male                             | 66             | 75             | 59            | 67            |
| BMI, kg/m <sup>2</sup>           | 25.7 (3.6)     | 28.6 (4.2)     | 30.1 (5.4)    | 25.1 (3.8)    |
| Physical activity, > 1h per week | NA             | NA             | NA            | NA            |
| High alcohol intake              | NA             | NA             | NA            | NA            |
| Smoker                           | 22             | 19             | 17            | 0             |
| Systolic BP, mmHg                | NA             | NA             | NA            | NA            |
| HDL-C, mg/dL                     | 52.1 (14.5)    | 44.5 (14.0)    | 44.6 (9.7)    | 56.3 (16.5)   |
| LDL-C, mg/dL                     | 123.1 (35.7)   | 120.5 (39.3)   | 100.1 (32.9)  | 97.7 (22.8)   |
| Triglycerides, mg/dL             | 131.9 (74.5)   | 190.1 (102.0)  | 156.1 (97.9)  | 77.7 (29.2)   |
| HbA <sub>1C</sub> , %            | 5.2 (1.1)      | 6.0 (1.3)      | 6.0 (0.8)     | 6.7 (1.04)    |
| HbA <sub>1C</sub> , mmol/mol     | 33 (12.0)      | 42 (14.2)      | 42 (8.7)      | 50 (11.4)     |
| Fasting glucose, mg/dL           | 98.4 (10.0)    | 151.8 (35.6)   | 144.6 (34.1)  | 146.6 (41.6)  |
| 2-h post-glucose load, mg/dL     | NA             | NA             | NA            | NA            |
| Statin usage                     | 10             | 27             | 55            | 33            |
| Beta blocker usage               | 9              | 18             | 28            | 22            |
| ACE inhibitor usage              | 4              | 15             | 38            | 44            |
| ARB usage                        | 4              | 10             | 14            | 11            |
| Metformin usage                  | 0              | 0              | 100           | 0             |
| Insulin therapy                  | 0              | 0              | 0             | 100           |

SUPPLEMENTARY DATA

**Supplementary Table 4. Variances of the six metabolites in other pair-wise comparisons in the discovery KORA F4 study**

Effect estimates were calculated using multivariable linear regression analysis with the fully adjusted model. Significant *P* values are indicated bold (*P* value<3.8E-04).

| Metabolite  | mt-T2D vs. NGT              |                 | mt-T2D vs. IGT              |                 | mt-T2D vs. it-T2D           |                 |
|-------------|-----------------------------|-----------------|-----------------------------|-----------------|-----------------------------|-----------------|
|             | Effect estimate<br>(95% CI) | <i>P</i> -value | Effect estimate<br>(95% CI) | <i>P</i> -value | Effect estimate<br>(95% CI) | <i>P</i> -value |
| PC ae C36:4 | -0.64(-0.93,-0.35)          | <b>1.65E-05</b> | -0.55(-0.85,-0.24)          | 4.99E-04        | -0.73(-1.21,-0.25)          | 3.53E-03        |
| PC ae C38:5 | -0.59(-0.88,-0.30)          | <b>7.69E-05</b> | -0.49(-0.80,-0.18)          | 2.08E-03        | -0.65(-1.14,-0.16)          | 1.14E-02        |
| PC ae C38:6 | -0.77(-1.05,-0.49)          | <b>1.09E-07</b> | -0.66(-0.95,-0.36)          | <b>1.60E-05</b> | -0.32(-0.77,0.14)           | 1.76E-01        |
| PC aa C36:0 | -0.74(-1.03,-0.45)          | <b>4.47E-07</b> | -0.69(-1.02,-0.37)          | <b>3.84E-05</b> | 0.25(-0.24,0.74)            | 3.29E-01        |
| PC aa C38:0 | -0.65(-0.94,-0.36)          | <b>8.75E-06</b> | -0.64(-0.96,-0.32)          | <b>1.07E-04</b> | -0.21(-0.70,0.28)           | 4.05E-01        |
| Ornithine   | -0.70(-0.98,-0.43)          | <b>5.71E-07</b> | -0.41(-0.74,-0.09)          | 1.38E-02        | -0.59(-1.12,-0.07)          | 2.85E-02        |
|             | it-T2D vs. NGT              |                 | it-T2D vs. IGT              |                 | it-T2D vs. ndt-T2D          |                 |
|             | Effect estimate<br>(95% CI) | <i>P</i> -value | Effect estimate<br>(95% CI) | <i>P</i> -value | Effect estimate<br>(95% CI) | <i>P</i> -value |
| PC ae C36:4 | 0.04(-0.47,0.55)            | 8.78E-01        | 0.15(-0.43,0.73)            | 6.11E-01        | -0.08(-0.57,0.41)           | 7.57E-01        |
| PC ae C38:5 | 0.01(-0.49,0.51)            | 9.76E-01        | 0.12(-0.46,0.70)            | 6.91E-01        | -0.09(-0.57,0.38)           | 7.03E-01        |
| PC ae C38:6 | -0.44(-0.93,0.05)           | 8.12E-02        | -0.32(-0.88,0.23)           | 2.57E-01        | -0.24(-0.69,0.22)           | 3.11E-01        |
| PC aa C36:0 | -0.61(-1.10,-0.11)          | 1.60E-02        | -0.44(-1.05,0.18)           | 1.63E-01        | -0.54(-1.03,-0.05)          | 3.26E-02        |
| PC aa C38:0 | -0.19(-0.68,0.31)           | 4.55E-01        | -0.17(-0.78,0.43)           | 5.77E-01        | -0.34(-0.82,0.14)           | 1.69E-01        |
| Ornithine   | -0.29(-0.76,0.19)           | 2.34E-01        | 0.20(-0.42,0.82)            | 5.27E-01        | 0.05(-0.44,0.54)            | 8.39E-01        |
|             | ndt-T2D vs. NGT             |                 | ndt-T2D vs. IGT             |                 | NGT vs. IGT                 |                 |
|             | Effect estimate<br>(95% CI) | <i>P</i> -value | Effect estimate<br>(95% CI) | <i>P</i> -value | Effect estimate<br>(95% CI) | <i>P</i> -value |
| PC ae C36:4 | 0.04(-0.16,0.24)            | 6.80E-01        | -0.02(-0.23,0.18)           | 8.24E-01        | -0.09(-0.21,0.02)           | 1.20E-01        |
| PC ae C38:5 | 0.03(-0.17,0.22)            | 7.81E-01        | -0.04(-0.25,0.16)           | 6.78E-01        | -0.11(-0.22,0.00)           | 6.04E-02        |
| PC ae C38:6 | 0.16(-0.03,0.35)            | 1.01E-01        | 0.05(-0.14,0.25)            | 6.04E-01        | -0.14(-0.25,-0.03)          | 1.56E-02        |
| PC aa C36:0 | 0.08(-0.11,0.28)            | 4.13E-01        | -0.02(-0.23,0.20)           | 8.91E-01        | -0.17(-0.28,-0.05)          | 3.99E-03        |
| PC aa C38:0 | -0.08(-0.27,0.12)           | 4.27E-01        | -0.10(-0.31,0.11)           | 3.63E-01        | -0.09(-0.20,0.03)           | 1.29E-01        |
| Ornithine   | 0.24(0.05,0.43)             | 1.16E-02        | -0.02(-0.24,0.19)           | 8.23E-01        | <b>-0.21(-0.32,-0.10)</b>   | <b>1.82E-04</b> |

SUPPLEMENTARY DATA

**Supplementary Table 5. Sensitivity analysis for the comparison between mt-T2D and ndt-T2D in the discovery KORA F4**

Effect estimates and *P* values were calculated with multivariable linear regression analysis adjusted for the full set of covariates and additionally 1) the years since the T2D diagnosis; 2) waist; 3) LDL-C; and 4) LDL-C with insulin. All newly diagnosed T2D patients in the follow up were assigned with 0 years for the duration of diabetes. CI denotes confidence interval. Significant *P* values are indicated bold (*P* value<3.8E-04).

| Metabolite  | Full model + duration of diabetes |                 | Full model + waist       |                 | Full model + LDL-C       |                 | Full model + LDL-C + insulin |                 |
|-------------|-----------------------------------|-----------------|--------------------------|-----------------|--------------------------|-----------------|------------------------------|-----------------|
|             | Effect estimate (95% CI)          | <i>P</i> -value | Effect estimate (95% CI) | <i>P</i> -value | Effect estimate (95% CI) | <i>P</i> -value | Effect estimate (95% CI)     | <i>P</i> -value |
| PC ae C36:4 | -0.69(-1.06,-0.31)                | <b>6.08E-05</b> | -0.66(-0.91,-0.41)       | <b>6.54E-07</b> | -0.60(-0.85,-0.35)       | <b>6.09E-06</b> | -0.61(-0.87,-0.36)           | <b>4.21E-06</b> |
| PC ae C38:5 | -0.56(-0.97,-0.15)                | <b>9.02E-05</b> | -0.62(-0.88,-0.36)       | <b>4.79E-06</b> | -0.54(-0.80,-0.29)       | <b>5.10E-05</b> | -0.55(-0.81,-0.29)           | <b>5.23E-05</b> |
| PC ae C38:6 | -0.64(-1.04,-0.25)                | <b>1.82E-04</b> | -0.58(-0.82,-0.33)       | <b>5.69E-06</b> | -0.47(-0.71,-0.23)       | <b>1.42E-04</b> | -0.48(-0.72,-0.24)           | <b>1.04E-04</b> |
| PC aa C36:0 | -0.69(-1.12,-0.26)                | 2.33E-03        | -0.56(-0.83,-0.29)       | <b>5.57E-05</b> | -0.49(-0.76,-0.22)       | <b>4.64E-04</b> | -0.50(-0.77,-0.23)           | <b>3.51E-04</b> |
| PC aa C38:0 | -0.74(-1.15,-0.32)                | 7.2E-04         | -0.68(-0.94,-0.42)       | <b>6.59E-07</b> | -0.57(-0.82,-0.32)       | <b>1.72E-05</b> | -0.57(-0.83,-0.32)           | <b>1.67E-05</b> |
| Ornithine   | -0.26(-0.68,0.16)                 | 0.23            | -0.58(-0.85,-0.32)       | <b>3.10E-05</b> | -0.57(-0.84,-0.29)       | <b>6.81E-05</b> | -0.58(-0.86,-0.30)           | <b>6.11E-05</b> |

SUPPLEMENTARY DATA

**Supplementary Table 6. Longitudinal analysis of the effect of metformin on metabolite profiles**

Linear mixed effect model (with metabolite as dependent and the group as independent variable) adjusted for both the crude and the full set of covariates in the longitudinal study of 912 participants with no anti-diabetic medical treatment at baseline KORA S4. Of these participants, 43 started metformin treatment after the baseline KORA S4 study. A sensitivity analysis was conducted in a subset of 55 participants who were ndt-T2D patients at KORA S4, 36 of them took metformin during the follow-up. Significant *P* values are indicated bold (*P* value<0.05).

| Metabolites                                                | Crude model<br>Effect estimate (95% CI) | <i>P</i> -value | Full model<br>Effect estimate (95% CI) | <i>P</i> -value |
|------------------------------------------------------------|-----------------------------------------|-----------------|----------------------------------------|-----------------|
| <b>With 912 participants</b>                               |                                         |                 |                                        |                 |
| PC ae C36:4                                                | -0.65 (-0.92,-0.36)                     | <b>2.38E-06</b> | -0.67 (-0.94,-0.41)                    | <b>1.01E-06</b> |
| PC ae C38:5                                                | -0.65 (-0.91,-0.37)                     | <b>1.53E-06</b> | -0.60 (-0.87,-0.35)                    | <b>5.18E-06</b> |
| PC ae C38:6                                                | -0.60 (-0.85,-0.35)                     | <b>2.32E-06</b> | -0.54 (-0.78,-0.30)                    | <b>1.30E-05</b> |
| <b>Sensitivity analysis with subset of 55 participants</b> |                                         |                 |                                        |                 |
| PC ae C36:4                                                | -0.69 (-1.13, -0.25)                    | <b>3.7E-03</b>  | -0.70 (-1.15, -0.24)                   | <b>4.35E-03</b> |
| PC ae C38:5                                                | -0.43 (-0.86, 0.01)                     | 0.06            | -0.45 (-0.89, -0.01)                   | <b>0.05</b>     |
| PC ae C38:6                                                | -0.36 (-0.80, 0.06)                     | 0.10            | -0.45 (-0.86, -0.03)                   | <b>0.04</b>     |



SUPPLEMENTARY DATA

**Supplementary Table 7. Associations between metformin treatment and change in lipid profile in the prospective KORA S4→F4 study**

The associations were calculated using linear mixed effect models of 912 participants with no anti-diabetic medical treatment at baseline KORA S4. Of these participants, 43 started metformin treatment after the baseline KORA S4 study. Statin users (n = 247) in either S4 or F4 were excluded from the analysis to rule out any potential influence of statin use. In total, 757 participants with longitudinal KORA S4→F4 data were used for the sensitivity analysis, 28 of them took metformin only during the follow-up. The full models were modified for investigation of the HDL-C and triglycerides. The linear mixed effect models (with the lipid levels as outcome and the grouping variable as predictor) were adjusted for age and sex (crude model). The full model was additionally adjusted for BMI, physical activity, alcohol intake, smoking, systolic BP, HbA<sub>1c</sub>, fasting glucose, and usage of statin, beta blockers, ACE inhibitors, and ARB. Associations for LDL-C and total cholesterol were additionally adjusted for HDL-C and triglycerides, whereas the associations for HDL-C and triglycerides were additionally adjusted for LDL-C and total cholesterol. Significant *P* values are indicated bold (*P* value<0.05).

|                                                             | Crude model              |                 | Full model               |                 |
|-------------------------------------------------------------|--------------------------|-----------------|--------------------------|-----------------|
|                                                             | Effect estimate (95% CI) | <i>P</i> -value | Effect estimate (95% CI) | <i>P</i> -value |
| <b>With 912 participants</b>                                |                          |                 |                          |                 |
| LDL-C                                                       | -13.14 (-22.88, -3.40)   | <b>8.34E-03</b> | -11.83 (-21.51, -2.15)   | <b>0.02</b>     |
| HDL-C                                                       | 0.05 (-3.03, 3.12)       | 0.98            | 0.38 (-2.60, 3.36)       | 0.80            |
| Total cholesterol                                           | -19.16 (-29.77, -8.55)   | <b>4.23E-04</b> | -16.18 (-26.03, -6.34)   | <b>0.02</b>     |
| Triglycerides                                               | -7.44 (-23.45, 8.57)     | 0.36            | -2.01 (-17.54, 13.52)    | 0.80            |
| <b>Sensitivity analysis with subset of 757 participants</b> |                          |                 |                          |                 |
| LDL-C                                                       | -9.77(-19.49, -0.05)     | <b>0.04</b>     | -8.68(-19.92, -0.85)     | <b>0.04</b>     |
| HDL-C                                                       | -0.78(-4.62, 3.05)       | 0.69            | 0.40(-3.35, 4.15)        | 0.83            |
| Total cholesterol                                           | -14.03(-24.47, -3.58)    | <b>0.01</b>     | -11.63(-21.23, -2.04)    | <b>0.02</b>     |
| Triglycerides                                               | -1.59(-20.35, 17.17)     | 0.87            | -5.18(-23.35, 12.99)     | 0.58            |

SUPPLEMENTARY DATA

**Supplementary Table 8. Mediation analysis of the associations between metformin, LDL-C and the three metabolites**

The associations were calculated using multivariable linear regression models with crude and full adjustments for 912 participants with no anti-diabetic medical treatment at baseline KORA S4. Of these participants, 43 started metformin treatment after the baseline KORA S4 study. Significant *P* values are indicated bold (*P* value<0.05).

|                                                                                                                                                       | Crude model                 |                 | Full model                  |                 |
|-------------------------------------------------------------------------------------------------------------------------------------------------------|-----------------------------|-----------------|-----------------------------|-----------------|
|                                                                                                                                                       | Effect estimate<br>(95% CI) | <i>P</i> -value | Effect estimate<br>(95% CI) | <i>P</i> -value |
| A) Association between metformin treatment and LDL-C adjusted for different metabolites (Direct effect of metformin on LDL-C)                         |                             |                 |                             |                 |
| Adjusted for PC ae C36:4                                                                                                                              | -10.1 (-19.74,-0.47)        | <b>0.04</b>     | -5.71 (-14.39,2.96)         | 0.2             |
| Adjusted for PC ae C38:5                                                                                                                              | -9.98 (-19.62,-0.33)        | <b>0.04</b>     | -5.65 (-14.34,3.04)         | 0.2             |
| Adjusted for PC ae C38:6                                                                                                                              | -7.74 (-17.21,1.73)         | 0.11            | -3.41 (-11.95,5.12)         | 0.43            |
| Adjusted for summed concentration*                                                                                                                    | -9.16 (-18.76,0.43)         | 0.06            | -5.04 (-13.69,3.62)         | 0.25            |
| B) Association between metformin treatment and metabolites                                                                                            |                             |                 |                             |                 |
| PC ae C36:4                                                                                                                                           | -0.62 (-0.88,-0.36)         | <b>2.51E-06</b> | -0.53 (-0.78,-0.28)         | <b>3.72E-05</b> |
| PC ae C38:5                                                                                                                                           | -0.63 (-0.89,-0.37)         | <b>1.97E-06</b> | -0.49 (-0.74,-0.25)         | <b>9.80E-05</b> |
| PC ae C38:6                                                                                                                                           | -0.60 (-0.85,-0.35)         | <b>2.76E-06</b> | -0.45 (-0.69,-0.22)         | <b>1.71E-04</b> |
| Summed concentration*                                                                                                                                 | -1.85 (-2.56,-1.14)         | <b>3.12E-07</b> | -1.47 (-2.15,-0.79)         | <b>2.16E-05</b> |
| C) Association between metabolites and LDL-C adjusted for metformin treatment                                                                         |                             |                 |                             |                 |
| PC ae C36:4                                                                                                                                           | 4.81 (3.19,6.44)            | <b>7.22E-09</b> | 4.76 (2.94,6.57)            | <b>2.95E-07</b> |
| PC ae C38:5                                                                                                                                           | 4.59 (2.97,6.21)            | <b>3.22E-08</b> | 4.77 (2.94,6.60)            | <b>3.64E-07</b> |
| PC ae C38:6                                                                                                                                           | 8.59 (6.97,10.21)           | <b>9.57E-25</b> | 8.81 (6.95,10.66)           | <b>2.69E-20</b> |
| Summed concentration*                                                                                                                                 | 2.31 (1.72,2.90)            | <b>1.49E-14</b> | 2.33 (1.67,3.00)            | <b>6.87E-12</b> |
| D) Association between metformin treatment and total cholesterol adjusted for different metabolites (Direct effect of metformin on total cholesterol) |                             |                 |                             |                 |
| Adjusted for PC ae C36:4                                                                                                                              | -16.45 (-26.93,-5.96)       | <b>2.13E-03</b> | -8.54 (-17.67,0.59)         | 0.07            |
| Adjusted for PC ae C38:5                                                                                                                              | -16.63 (-27.10,-6.16)       | <b>1.87E-03</b> | -8.57 (-17.70,0.56)         | 0.07            |
| Adjusted for PC ae C38:6                                                                                                                              | -15.45 (-25.76,-5.13)       | <b>3.38E-03</b> | -6.66 (-15.55,2.23)         | 0.14            |
| Adjusted for summed concentration*                                                                                                                    | -15.71 (-26.11,-5.31)       | <b>3.09E-03</b> | -7.10 (-16.12,1.91)         | 0.12            |
| E) Association between metabolites and total cholesterol adjusted for metformin treatment                                                             |                             |                 |                             |                 |
| PC ae C36:4                                                                                                                                           | 8.02 (6.32,9.73)            | <b>4.45E-20</b> | 5.81 (3.86,7.76)            | <b>5.87E-09</b> |
| PC ae C38:5                                                                                                                                           | 7.94 (6.24,9.63)            | <b>7.76E-20</b> | 5.60 (3.64,7.57)            | <b>2.59E-08</b> |
| PC ae C38:6                                                                                                                                           | 11.69 (10.01,13.37)         | <b>5.52E-41</b> | 9.19 (7.19,11.1)            | <b>3.24E-19</b> |
| Summed concentration*                                                                                                                                 | 3.58 (2.97,4.19)            | <b>3.61E-30</b> | 2.64 (1.92,3.35)            | <b>5.25E-13</b> |

\*The summed concentration refers to the overall concentration of the three metabolites (PC ae C36:4, PC ae C38:5, PC ae C38:6)

SUPPLEMENTARY DATA

**Supplementary Table 9. Mediation effects of the three metabolites for the association between metformin treatment and LDL-C reduction after removing statin users**

Statin users (n = 247) in either S4 or F4 were excluded from the analysis to rule out any potential influence of statin use. In total, 757 participants with longitudinal KORA S4→F4 data were used for the sensitivity mediation analysis. 28 of these participants took metformin only during the follow-up. The mediation effects for three metformin-associated metabolites were assessed individually and as a combined total concentration using both the crude model and the full model. Significant *P* values are indicated bold (*P* value<0.05).

|                                                                        | Crude model              |                 | Full model               |                 |
|------------------------------------------------------------------------|--------------------------|-----------------|--------------------------|-----------------|
|                                                                        | Effect estimate (95% CI) | <i>P</i> -value | Effect estimate (95% CI) | <i>P</i> -value |
| A) Mediation of the effect of metformin on LDL-C reduction             |                          |                 |                          |                 |
| PC ae C36:4                                                            | -3.34 (-4.97, -1.71)     | <b>2.59E-04</b> | -1.11 (-1.74, -0.48)     | <b>0.04</b>     |
| PC ae C38:5                                                            | -3.28 (-4.85, -1.71)     | <b>2.45E-04</b> | -0.84 (-1.29, -0.39)     | 0.07            |
| PC ae C38:6                                                            | -5.42 (-8.81, -2.03)     | <b>3.80E-05</b> | -2.77 (-4.73, -0.81)     | <b>0.006</b>    |
| Summed concentration                                                   | -4.18 (-6.28, -2.08)     | <b>5.46E-05</b> | -1.73 (-2.75, -0.71)     | <b>0.016</b>    |
| B) Mediation of the effect of metformin on total cholesterol reduction |                          |                 |                          |                 |
| PC ae C36:4                                                            | -2.85 (-5.48, -0.21)     | <b>0.01</b>     | -1.10 (-1.87, -0.33)     | 0.08            |
| PC ae C38:5                                                            | -2.63 (-4.90, -0.36)     | <b>0.01</b>     | -0.71 (-1.16, -0.26)     | 0.14            |
| PC ae C38:6                                                            | -4.15 (-8.51, -1.76)     | <b>0.01</b>     | -1.46 (-2.89, -0.03)     | 0.09            |
| Summed concentration                                                   | -3.74 (-7.26, -0.22)     | <b>0.01</b>     | -1.26 (-2.20, -0.32)     | 0.07            |

SUPPLEMENTARY DATA

**Supplementary Table 10. Genes with associated common variants linked to the three acyl-alkyl PCs identified by PSEA**

Abbreviations, clusters, functions, associated diseases of 17 genes identified by PSEA are reported in the first four columns, respectively. The chromosome number and location (minimum and maximum) are listed in the following columns. The considered number of SNPs considered by using PSEA is shown in the last column. All listed genes showed a  $P < 1.0E-04$  in a permutation test in the PSEA.

| Gene                          | Gene cluster | Functions                             | Associated diseases                                                    | Chr. | Position (min. – max.) | No. of SNPs |
|-------------------------------|--------------|---------------------------------------|------------------------------------------------------------------------|------|------------------------|-------------|
| <i>C7orf42</i>                | 1            | Unclear                               |                                                                        | 7    | 65913652-66100806      | 83          |
| <i>SLC26A4</i>                | 2            | Transport (chloride, iodide, sulfate) | Deafness (1)                                                           | 7    | 106978397-107183738    | 146         |
| <i>LOC286002</i> <sup>§</sup> | 2            | Transcription                         |                                                                        | 7    | 107045357-107198952    | 114         |
| <i>DAGLA</i>                  | 3            | Insulin secretion, lipid metabolism   | Spinocerebellar ataxia (2)                                             | 11   | 61094821-61309777      | 122         |
| <i>C11orf9</i>                | 3            | Transcription                         | Retinopathy (3)                                                        | 11   | 61166755-61352140      | 104         |
| <i>FEN1</i>                   | 3            | DNA repair, DNA transcription         | Cancer (breast (4; 5), ovarian gastrointestinal (6), lung (7))         | 11   | 61210766-61360086      | 96          |
| <i>DKFZP434K028</i>           | 3            | Unclear                               |                                                                        | 11   | 61238622-61391664      | 106         |
| <i>FADS2</i>                  | 3            | Fatty acid metabolism                 | Retinopathy (8),<br>Coronary artery disease (9)                        | 11   | 61244266-61430694      | 131         |
| <i>C11orf10</i>               | 3            | Unclear                               |                                                                        | 11   | 61273486-61426522      | 114         |
| <i>MIR611</i> <sup>§</sup>    | 3            | Transcription                         |                                                                        | 11   | 61277244-61426522      | 112         |
| <i>FADS1</i>                  | 3            | Fatty acid metabolism                 | Diabetes<br>Retinopathy (10-13)                                        | 11   | 61287413-61448917      | 119         |
| <i>MIR1908</i> <sup>§</sup>   | 3            | Transcription                         |                                                                        | 11   | 61300075-61448917      | 112         |
| <i>FADS3</i>                  | 3            | Fatty acid metabolism                 | Diabetes (14),<br>Coronary artery disease (15),<br>Hyperlipidemia (16) | 11   | 61358484-61525549      | 145         |
| <i>BEST1</i>                  | 3            | Transport (chloride, calcium)         | Retinopathy (17)                                                       | 11   | 61365899-61527475      | 138         |
| <i>RAB3IL1</i>                | 3            | Transport (protein)                   | Retinopathy (18)                                                       | 11   | 61381461-61551489      | 144         |
| <i>MANSC1</i>                 | 4            | Unclear                               | Cancer (prostate, breast,<br>lymphoma, leukemia) (19; 20)              | 12   | 12333540-12502043      | 159         |
| <i>C20orf94 (SLX4IP)</i>      | 5            | Unclear (possibly DNA repair)         | Childhood acute<br>lymphoblastic leukemia (21)                         | 20   | 10254387-10591850      | 432         |

<sup>§</sup>Gene has no proteins in *Homo sapiens* in STITCH (22).

SUPPLEMENTARY DATA

**Supplementary Table 11. Known metformin target genes**

Known metformin target genes were retrieved from DrugBank (23).

| <b>Metformin target gene</b>                                 | <b>Full biochemical name</b>       |
|--------------------------------------------------------------|------------------------------------|
| <i>AMPK</i>                                                  | AMP-activated protein kinase       |
| <i>SLC22A1</i> (also known as <i>OCT1</i> )                  | solute carrier family 22, member 1 |
| <i>SLC22A2</i> (also known as <i>OCT2</i> )                  | solute carrier family 22, member 2 |
| <i>SLC22A3</i> (also known as <i>OCT3</i> )                  | solute carrier family 22, member 3 |
| <i>SLC47A1</i> (also known as <i>MATE1</i> )                 | solute carrier family 47, member 1 |
| <i>SLC29A4</i> (also known as <i>hENT4</i> and <i>PMAT</i> ) | solute carrier family 29, member 4 |

**Supplementary Table 12. Interactions between metformin target genes, pathway related proteins and PSEA identified genes**

The first two columns show the names of the pairwise interaction partners in the investigated network. The following columns describe the observed interaction with literature and the underlying species.

| <b>Action 1</b> | <b>Action 2</b> | <b>Interaction</b>                                                                         | <b>Species</b> |
|-----------------|-----------------|--------------------------------------------------------------------------------------------|----------------|
| Metformin       | AMPK            | In liver and muscle: Metformin → AMPK (24; 25);<br>In hypothalamus: Metformin -  AMPK (26) | Rat<br>Rat     |
| AMPK            | SREBP1c         | In liver: AMPK -  SREBP1c (27)                                                             | Mouse          |
| Leptin          | AMPK            | In liver: Leptin → AMPK (28);<br>In hypothalamus: Leptin -  AMPK (29)                      | Mouse<br>Mouse |
| SREBP1c         | FADS2           | In liver: SREBP1c → FADS2 (30)                                                             | Mouse          |
| SREBP1c         | FADS1           | In liver: SREBP1c → FADS1 (30)                                                             | Mouse          |
| Leptin          | SREBP1c         | In liver: Leptin -  SREBP1c (31)                                                           | Mouse          |
| Leptin          | FADS2           | In liver: Leptin -  FADS2 (32)                                                             | Rat            |

## SUPPLEMENTARY DATA

### Reference

1. Reisi S, Sanati MH, Tabatabaiefar MA, Ahmadian S, Reisi S, Parchami S, Porjafari H, Shahi H, Shavarzi A, Hashemzade Chaleshtori M: The Study of SLC26A4 Gene Causing Autosomal Recessive Hearing Loss by Linkage Analysis in a Cohort of Iranian Populations. *International journal of molecular and cellular medicine* 2014;3:176-182
2. Knight MA, Hernandez D, Diede SJ, Dauwse HG, Rafferty I, van de Leemput J, Forrest SM, Gardner RJ, Storey E, van Ommen GJ, Tapscott SJ, Fischbeck KH, Singleton AB: A duplication at chromosome 11q12.2-11q12.3 is associated with spinocerebellar ataxia type 20. *Human molecular genetics* 2008;17:3847-3853
3. Stohr H, Marquardt A, White K, Weber BH: cDNA cloning and genomic structure of a novel gene (C11orf9) localized to chromosome 11q12-->q13.1 which encodes a highly conserved, potential membrane-associated protein. *Cytogenetics and cell genetics* 2000;88:211-216
4. Abdel-Fatah TM, Russell R, Albarakati N, Maloney DJ, Dorjsuren D, Rueda OM, Moseley P, Mohan V, Sun H, Abbotts R, Mukherjee A, Agarwal D, Illuzzi JL, Jadhav A, Simeonov A, Ball G, Chan S, Caldas C, Ellis IO, Wilson DM, 3rd, Madhusudan S: Genomic and protein expression analysis reveals flap endonuclease 1 (FEN1) as a key biomarker in breast and ovarian cancer. *Molecular oncology* 2014;8:1326-1338
5. Lv Z, Liu W, Li D, Liu L, Wei J, Zhang J, Ge Y, Wang Z, Chen H, Zhou C, Yuan Q, Zhou L, Yang M: Association of functional FEN1 genetic variants and haplotypes and breast cancer risk. *Gene* 2014;538:42-45
6. Liu L, Zhou C, Zhou L, Peng L, Li D, Zhang X, Zhou M, Kuang P, Yuan Q, Song X, Yang M: Functional FEN1 genetic variants contribute to risk of hepatocellular carcinoma, esophageal cancer, gastric cancer and colorectal cancer. *Carcinogenesis* 2012;33:119-123
7. Yang M, Guo H, Wu C, He Y, Yu D, Zhou L, Wang F, Xu J, Tan W, Wang G, Shen B, Yuan J, Wu T, Lin D: Functional FEN1 polymorphisms are associated with DNA damage levels and lung cancer risk. *Human mutation* 2009;30:1320-1328
8. Meyers KJ, Mares JA, Igo RP, Jr., Truitt B, Liu Z, Millen AE, Klein M, Johnson EJ, Engelman CD, Karki CK, Blodi B, Gehrs K, Tinker L, Wallace R, Robinson J, LeBlanc ES, Sarto G, Bernstein PS, SanGiovanni JP, Iyengar SK: Genetic evidence for role of carotenoids in age-related macular degeneration in the Carotenoids in Age-Related Eye Disease Study (CAREDS). *Investigative ophthalmology & visual science* 2014;55:587-599
9. Aulchenko YS, Ripatti S, Lindqvist I, Boomsma D, Heid IM, Pramstaller PP, Penninx BW, Janssens AC, Wilson JF, Spector T, Martin NG, Pedersen NL, Kyvik KO, Kaprio J, Hofman A, Freimer NB, Jarvelin MR, Gyllensten U, Campbell H, Rudan I, Johansson A, Marroni F, Hayward C, Vitart V, Jonasson I, Pattaro C, Wright A, Hastie N, Pichler I, Hicks AA, Falchi M, Willemsen G, Hottenga JJ, de Geus EJ, Montgomery GW, Whitfield J, Magnusson P, Saharinen J, Perola M, Silander K, Isaacs A, Sijbrands EJ, Uitterlinden AG, Witteman JC, Oostra BA, Elliott P, Ruukonen A, Sabatti C, Gieger C, Meitinger T, Kronenberg F, Doring A, Wichmann HE, Smit JH, McCarthy MI, van Duijn CM, Peltonen L, Consortium E: Loci influencing lipid levels and coronary heart disease risk in 16 European population cohorts. *Nat Genet* 2009;41:47-55
10. Goodarzi MO, Guo X, Cui J, Jones MR, Haritunians T, Xiang AH, Chen YD, Taylor KD, Buchanan TA, Hsueh WA, Raffel LJ, Rotter JI: Systematic evaluation of validated type 2 diabetes and glycaemic trait loci for association with insulin clearance. *Diabetologia* 2013;56:1282-1290
11. Neale BM, Fagerness J, Reynolds R, Sobrin L, Parker M, Raychaudhuri S, Tan PL, Oh EC, Merriam JE, Souied E, Bernstein PS, Li B, Frederick JM, Zhang K, Brantley MA, Jr., Lee AY, Zack DJ, Campochiaro B, Campochiaro P, Ripke S, Smith RT, Barile GR, Katsanis N, Allikmets R, Daly MJ, Seddon JM: Genome-wide association study of advanced age-related macular degeneration identifies a

## SUPPLEMENTARY DATA

role of the hepatic lipase gene (LIPC). *Proceedings of the National Academy of Sciences of the United States of America* 2010;107:7395-7400

12. Fauser S, Smailhodzic D, Caramoy A, van de Ven JP, Kirchhof B, Hoyng CB, Klevering BJ, Liakopoulos S, den Hollander AI: Evaluation of serum lipid concentrations and genetic variants at high-density lipoprotein metabolism loci and TIMP3 in age-related macular degeneration. *Investigative ophthalmology & visual science* 2011;52:5525-5528

13. Meyers KJ, Johnson EJ, Bernstein PS, Iyengar SK, Engelman CD, Karki CK, Liu Z, Igo RP, Jr., Truitt B, Klein ML, Snodderly DM, Blodi BA, Gehrs KM, Sarto GE, Wallace RB, Robinson J, LeBlanc ES, Hageman G, Tinker L, Mares JA: Genetic determinants of macular pigments in women of the Carotenoids in Age-Related Eye Disease Study. *Investigative ophthalmology & visual science* 2013;54:2333-2345

14. Huang T, Sun J, Chen Y, Xie H, Xu D, Huang J, Li D: Genetic variants in desaturase gene, erythrocyte fatty acids, and risk for type 2 diabetes in Chinese Hans. *Nutrition* 2014;30:897-902

15. Kwak JH, Paik JK, Kim OY, Jang Y, Lee SH, Ordovas JM, Lee JH: FADS gene polymorphisms in Koreans: association with omega6 polyunsaturated fatty acids in serum phospholipids, lipid peroxides, and coronary artery disease. *Atherosclerosis* 2011;214:94-100

16. Plaisier CL, Horvath S, Huertas-Vazquez A, Cruz-Bautista I, Herrera MF, Tusie-Luna T, Aguilar-Salinas C, Pajukanta P: A systems genetics approach implicates USF1, FADS3, and other causal candidate genes for familial combined hyperlipidemia. *PLoS genetics* 2009;5:e1000642

17. Alapati A, Goetz K, Suk J, Navani M, Al-Tarouti A, Jayasundera T, Tumminia SJ, Lee P, Ayyagari R: Molecular diagnostic testing by eyeGENE: analysis of patients with hereditary retinal dystrophy phenotypes involving central vision loss. *Investigative ophthalmology & visual science* 2014;55:5510-5521

18. Bogdanov P, Corraliza L, J AV, Carvalho AR, Garcia-Arumi J, Ramos D, Ruberte J, Simo R, Hernandez C: The db/db mouse: a useful model for the study of diabetic retinal neurodegeneration. *PLoS One* 2014;9:e97302

19. Haiman CA, Han Y, Feng Y, Xia L, Hsu C, Sheng X, Pooler LC, Patel Y, Kolonel LN, Carter E, Park K, Le Marchand L, Van Den Berg D, Henderson BE, Stram DO: Genome-wide testing of putative functional exonic variants in relationship with breast and prostate cancer risk in a multiethnic population. *PLoS genetics* 2013;9:e1003419

20. Haferlach C, Bacher U, Kohlmann A, Schindela S, Alpermann T, Kern W, Schnittger S, Haferlach T: CDKN1B, encoding the cyclin-dependent kinase inhibitor 1B (p27), is located in the minimally deleted region of 12p abnormalities in myeloid malignancies and its low expression is a favorable prognostic marker in acute myeloid leukemia. *Haematologica* 2011;96:829-836

21. Meissner B, Bartram T, Eckert C, Trka J, Panzer-Grumayer R, Hermanova I, Ellinghaus E, Franke A, Moricke A, Schrauder A, Teigler-Schlegel A, Dorge P, von Stackelberg A, Basso G, Bartram CR, Kirschner-Schwabe R, Bornhauser B, Bourquin JP, Cazzaniga G, Hauer J, Attarbaschi A, Izraeli S, Zaliouva M, Cario G, Zimmermann M, Avigad S, Sokalska-Duhme M, Metzler M, Schrappe M, Koehler R, Te Kronnie G, Stanulla M: Frequent and sex-biased deletion of SLX4IP by illegitimate V(D)J-mediated recombination in childhood acute lymphoblastic leukemia. *Human molecular genetics* 2014;23:590-601

22. Kuhn M, Szklarczyk D, Pletscher-Frankild S, Blicher TH, von Mering C, Jensen LJ, Bork P: STITCH 4: integration of protein-chemical interactions with user data. *Nucleic acids research* 2014;42:D401-407

23. Knox C, Law V, Jewison T, Liu P, Ly S, Frolkis A, Pon A, Banco K, Mak C, Neveu V, Djoumbou Y, Eisner R, Guo AC, Wishart DS: DrugBank 3.0: a comprehensive resource for 'omics' research on drugs. *Nucleic acids research* 2011;39:D1035-1041

## SUPPLEMENTARY DATA

24. Lim CT, Kola B, Korbonits M: AMPK as a mediator of hormonal signalling. *Journal of molecular endocrinology* 2010;44:87-97
25. Zhou G, Myers R, Li Y, Chen Y, Shen X, Fenyk-Melody J, Wu M, Ventre J, Doebber T, Fujii N, Musi N, Hirshman MF, Goodyear LJ, Moller DE: Role of AMP-activated protein kinase in mechanism of metformin action. *The Journal of clinical investigation* 2001;108:1167-1174
26. Chau-Van C, Gamba M, Salvi R, Gaillard RC, Pralong FP: Metformin inhibits adenosine 5'-monophosphate-activated kinase activation and prevents increases in neuropeptide Y expression in cultured hypothalamic neurons. *Endocrinology* 2007;148:507-511
27. Awazawa M, Ueki K, Inabe K, Yamauchi T, Kaneko K, Okazaki Y, Bardeesy N, Ohnishi S, Nagai R, Kadowaki T: Adiponectin suppresses hepatic SREBP1c expression in an AdipoR1/LKB1/AMPK dependent pathway. *Biochemical and biophysical research communications* 2009;382:51-56
28. Miyamoto L, Ebihara K, Kusakabe T, Aotani D, Yamamoto-Kataoka S, Sakai T, Aizawa-Abe M, Yamamoto Y, Fujikura J, Hayashi T, Hosoda K, Nakao K: Leptin activates hepatic 5'-AMP-activated protein kinase through sympathetic nervous system and alpha1-adrenergic receptor: a potential mechanism for improvement of fatty liver in lipodystrophy by leptin. *The Journal of biological chemistry* 2012;287:40441-40447
29. Minokoshi Y, Alquier T, Furukawa N, Kim YB, Lee A, Xue B, Mu J, Fofelle F, Ferre P, Birnbaum MJ, Stuck BJ, Kahn BB: AMP-kinase regulates food intake by responding to hormonal and nutrient signals in the hypothalamus. *Nature* 2004;428:569-574
30. Matsuzaka T, Shimano H, Yahagi N, Amemiya-Kudo M, Yoshikawa T, Hasty AH, Tamura Y, Osuga J, Okazaki H, Iizuka Y, Takahashi A, Sone H, Gotoda T, Ishibashi S, Yamada N: Dual regulation of mouse Delta(5)- and Delta(6)-desaturase gene expression by SREBP-1 and PPARalpha. *Journal of lipid research* 2002;43:107-114
31. Tobe K, Suzuki R, Aoyama M, Yamauchi T, Kamon J, Kubota N, Terauchi Y, Matsui J, Akanuma Y, Kimura S, Tanaka J, Abe M, Ohsumi J, Nagai R, Kadowaki T: Increased expression of the sterol regulatory element-binding protein-1 gene in insulin receptor substrate-2(-/-) mouse liver. *The Journal of biological chemistry* 2001;276:38337-38340
32. Gallardo N, Bonzon-Kulichenko E, Fernandez-Agullo T, Molto E, Gomez-Alonso S, Blanco P, Carrascosa JM, Ros M, Andres A: Tissue-specific effects of central leptin on the expression of genes involved in lipid metabolism in liver and white adipose tissue. *Endocrinology* 2007;148:5604-5610
